# Supplementary material for: Computational Prediction of ω-Transaminase Specificity by a Combination of Docking and Molecular Dynamics Simulations
Source: PubMed Central journal article supplement — J Chem Inf Model. 2021 Oct 15;61(11):5569–80. doi: 10.1021/acs.jcim.1c00617 (PMC8611723; doi:10.1021/acs.jcim.1c00617), 2021-10-15
Supplement: ci1c00617_si_001.pdf [file ci1c00617_si_001.pdf]

# Supporting Information

## Computational Prediction of $\omega$ -Transaminase Specificity by a Combination of Docking and Molecular Dynamics Simulations

Carlos Ramírez-Palacios<sup>1,2</sup>, Hein J. Wijma<sup>1</sup>, Sebastian Thallmair<sup>2,3</sup>, Siewert J. Marrink<sup>2</sup>, Dick B. Janssen<sup>1\*</sup>

<sup>1</sup>Biotransformation and Biocatalysis, Groningen Biomolecular Sciences and Biotechnology Institute (GBB), University of Groningen, Nijenborgh 4, 9747 AG Groningen, Groningen, The Netherlands

<sup>2</sup>Molecular Dynamics, Groningen Biomolecular Sciences and Biotechnology Institute (GBB), University of Groningen, Nijenborgh 7, 9747 AG Groningen, Groningen, The Netherlands

<sup>3</sup>Frankfurt Institute for Advanced Studies, Ruth-Moufang-Str. 1, 60438 Frankfurt am Main, Germany

\* Corresponding author

Groningen Biomolecular Sciences and Biotechnology Institute

University of Groningen

Nijenborgh 4

9747 AG Groningen

The Netherlands

E-mail: d.b.janssen@rug.nl

## $\Delta\Delta G^\ddagger$ deviations from experimental values

Equation S1 converts the  $ee^0\%$  for product obtained in an asymmetric synthesis reaction to a fraction of products  $[S]/[R]$ :

$$\frac{[S]}{[R]} = \frac{\frac{ee^0\%}{100} + 1}{1 - \frac{ee^0\%}{100}} \quad (S1)$$

The relative reaction rates for the amination of the prochiral ketone to form the (*S*)- or (*R*)-enantiomer determine the outcome:

$$\frac{[S]}{[R]} = \frac{v_S}{v_R} \quad (S2)$$

We can define  $\Delta\Delta G^\ddagger$  as the difference in the transition state energy for each process:

$$\Delta\Delta G^\ddagger = \Delta G_R^\ddagger - \Delta G_S^\ddagger \quad (S3)$$

In asymmetric transformations, the relation between  $\Delta G_R^\ddagger$  and  $\Delta G_S^\ddagger$  is given by:

$$\Delta\Delta G^\ddagger = -RT \ln\left(\frac{v_S}{v_R}\right) \quad (S4)$$

where,  $R = 8.314 \text{ J}\cdot\text{mol}^{-1}\cdot\text{K}^{-1}$ , and  $T = 300 \text{ K}$ .

Therefore, the deviation from the experimental data provided in Table 1 is computed as follows:

$$deviation = \Delta\Delta G_{calc}^\ddagger - \Delta\Delta G_{exp}^\ddagger = -RT \ln\left(\frac{v_S}{v_R}\right)_{calc} - -RT \ln\left(\frac{v_S}{v_R}\right)_{exp} \quad (S5)$$

## Additional figures and tables

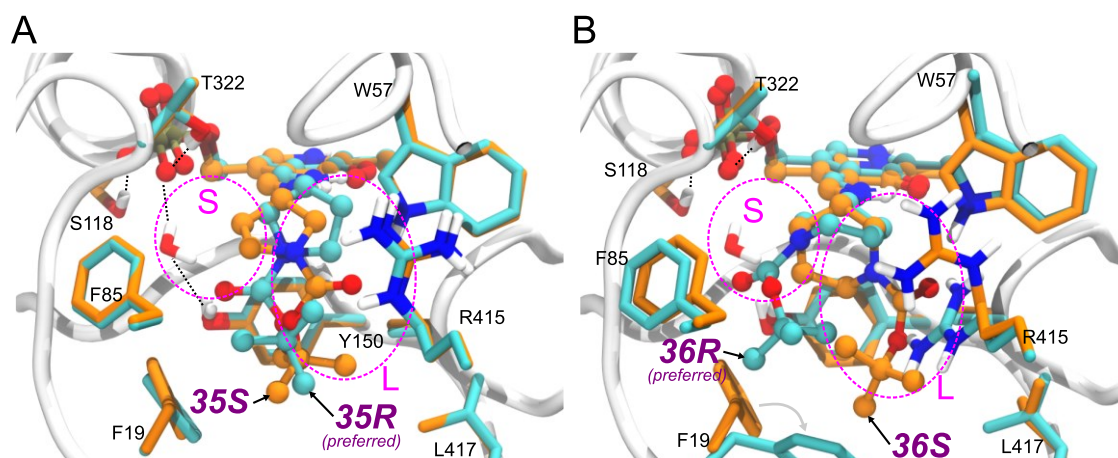

**Figure S1.** Docked models of the ligands **A**) 35R and 35S, and **B**) 36R and 36S. The carbon atoms of the (*S*)- and (*R*)-enantiomer are colored orange and cyan, respectively. The approximate location of the small (*S*) and large (*L*) binding pockets are circled in magenta.

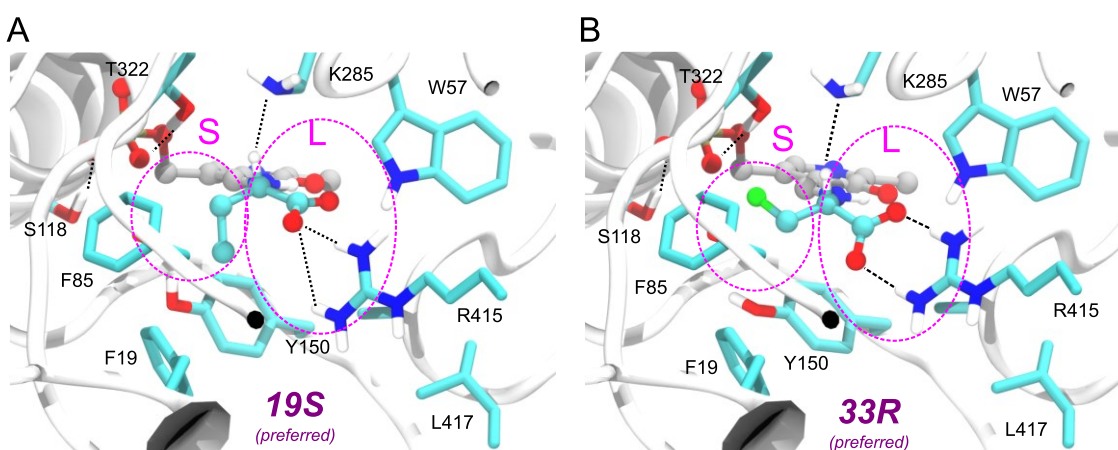

**Figure S2.** Docked models of external aldimine intermediates of amines **A**) 19 (alanine) and **B**) 33 (3-fluoroalanine). Both ligands can form either one or two Arg415::COO<sup>-</sup> salt bridges, which is reflected in the high enantioselectivity of *Vf*-TA to produce the (*S*)-amine of 19 and the (*R*)-amine of 33 ( $ee^{\%}_{\text{exp}}$  is 99 and -98%, respectively). The predictions agree with the experimental observations only when the carboxylate group is modelled in the deprotonated form, otherwise there is no salt bridge formation and the  $ee^{\%}_{\text{calc}}$  diverges from expected values.

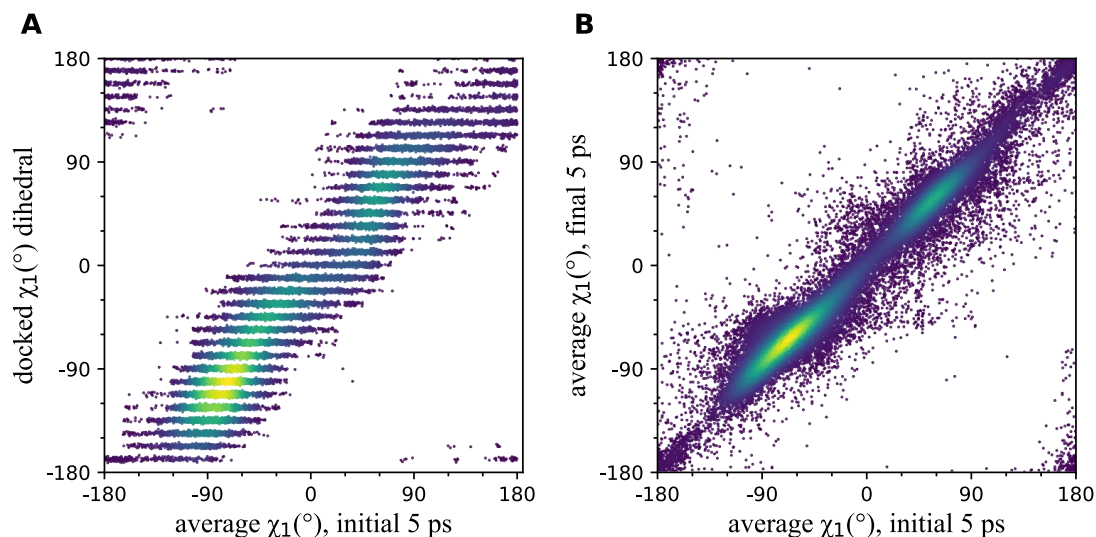

**Figure S3. KDE scatter plots showing the variation in the  $\chi_1$  dihedral at the beginning and end of the 20 ps MD trajectories.** The  $\chi_1$  dihedral angle was set to a fixed value at the docking stage but allowed to move freely during the MD simulations. **A)** The dihedral  $\chi_1$  did not substantially change its value during the initial 5.0 ps of simulation time respect to the initial value set at the docking stage. **B)** Further, no substantial difference is observed between the value of the  $\chi_1$  dihedral during the final 5.0 ps of simulation time with respect to the initial 5.0 ps. Both plots were made using data from all simulations (49 compounds, 2 enantiomers per compound, 64 docked structures per ligand, 5 seeds per docked structure = 31,360 simulations). The color of each dot corresponds to the density of observations in that area, with bluish purple corresponding to the lowest density.

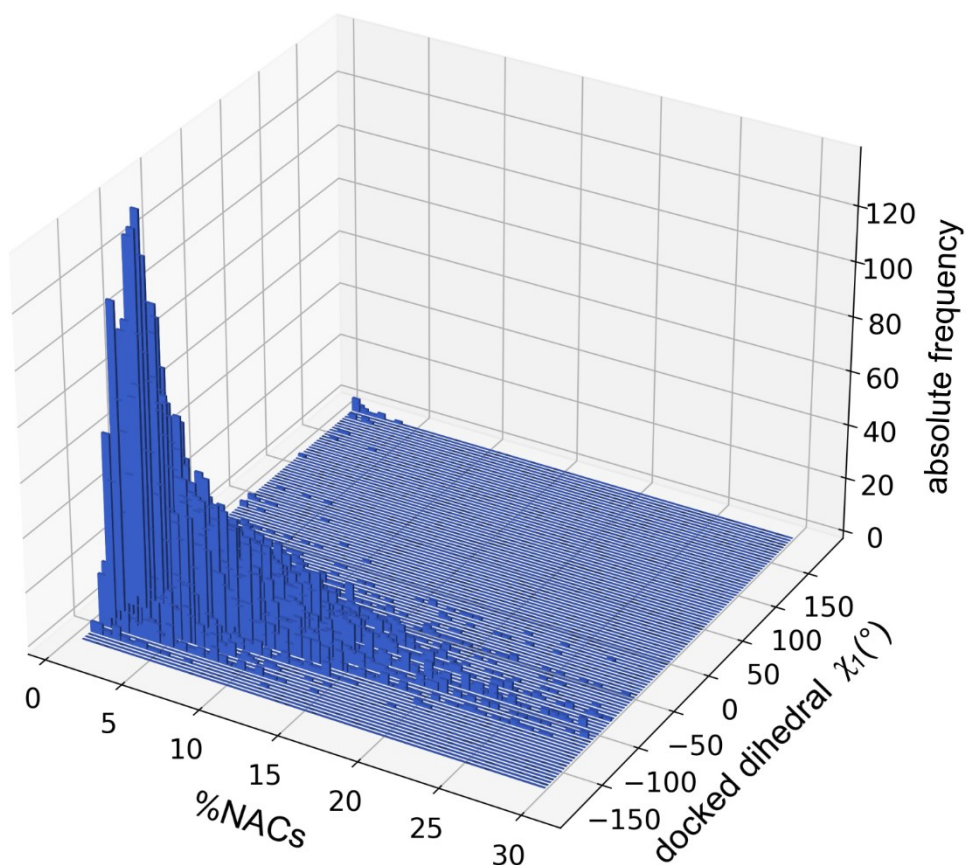

**Figure S4. 3D histogram showing the distribution of trajectories with calculated %NACs as a function of their initial  $\chi_1$  dihedrals.** The histogram includes the NAC occurrence of all trajectories from all compounds in the benchmark dataset (49 compounds, 2 enantiomers per compound, 64 simulations per enantiomer, 5 seeds per simulation). NAC occurrence during the MD trajectory is strongly influenced by the initial  $\chi_1$  dihedral. The closer the docked external aldimine complexes were to a catalytic orientation ( $\chi_1 = -90^{\circ}$ ), the higher chance of producing NACs during the 20 ps MD trajectory. The 20 ps of simulation time is not long enough to allow the  $\chi_1$  dihedral to evolve away from its initial configuration.

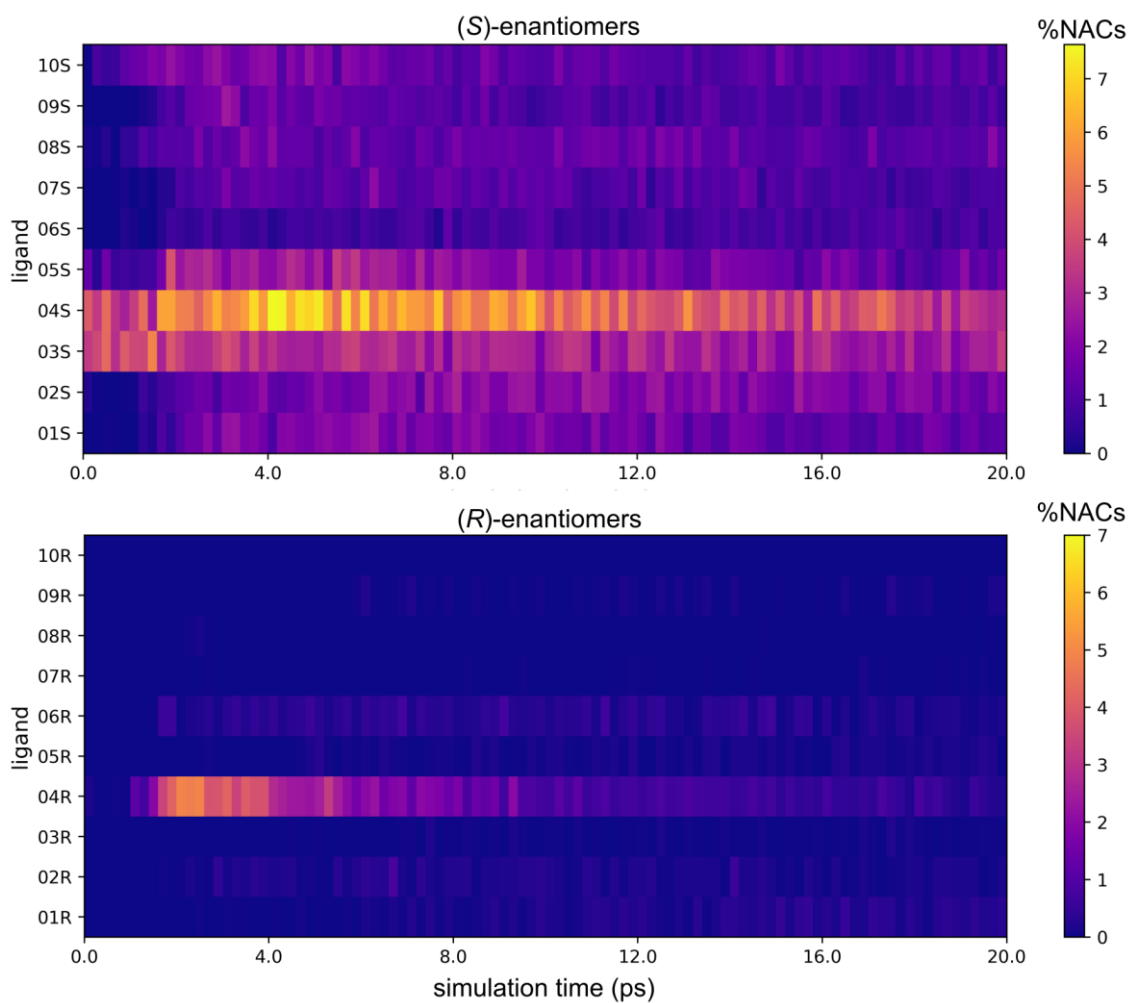

**Figure S5. NAC occurrence measured at different simulation windows.** The frequency of NAC occurrence was measured using a sliding window (size = 0.2 ps) along the MD trajectory. The entire dataset consisted of 49 unique compounds, but only compounds **01** – **10** are shown in this figure. (*S*)- and (*R*)-enantiomers are shown in the *top* and *bottom* panels, respectively. Because the NAC occurrence is evenly distributed along most of the trajectories,  $ee^{\%}_{\text{calc}}$  is not dependent on simulation length.

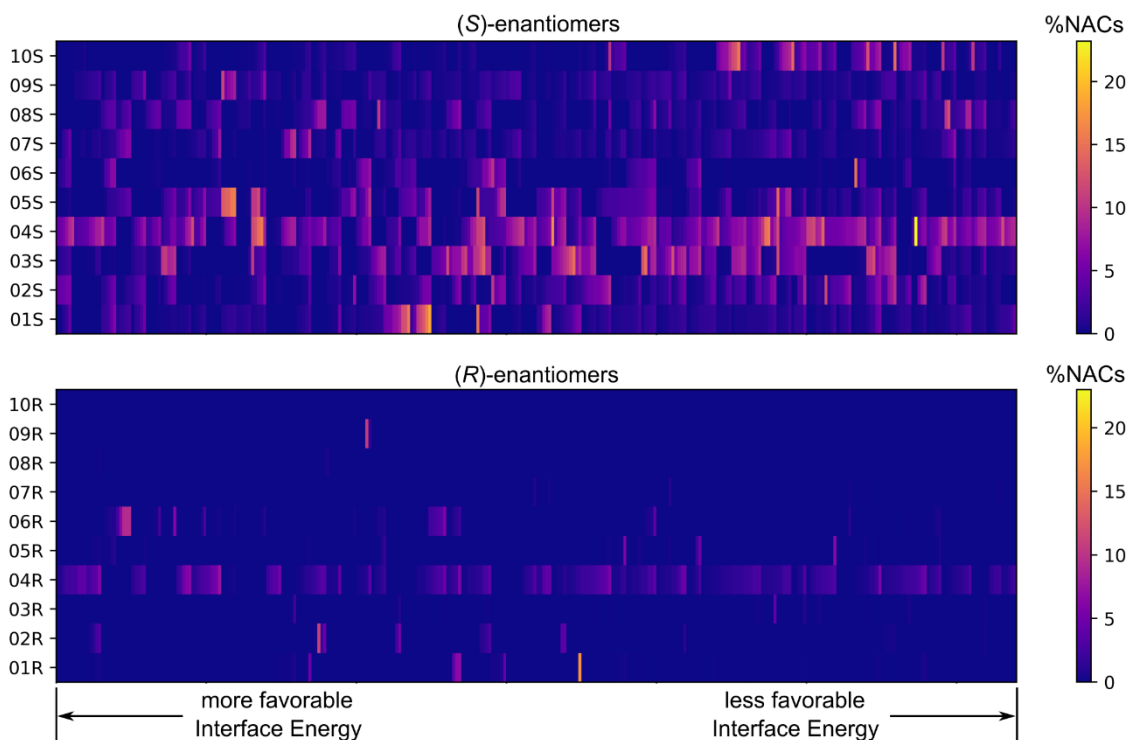

**Figure S6. Heatmap showing the NAC occurrence obtained from MD simulations of several ligands (y-axis) sorted by the Rosetta score of the starting structures (x-axis).** Within the set of selected structures (top20%), the NAC-producing potential of a protein-ligand complex is independent from its Rosetta Interface Energy. For any given compound, the frequency of NACs observed in the  $64 \times 5$  MD simulations (64 docked structures per compound; 5 seeds per docked structure) is shown in the heatmap. The docked structures were sorted along the x-axis from more favourable (*left*) to less favourable (*right*) Rosetta Interface Energy. The entire dataset consisted of 49 unique compounds, but only compounds **01** – **10** are shown for clarity. (*S*)- and (*R*)-enantiomers are shown in the *top* and *bottom* panels, respectively. Because the NAC-producing potential of a docked structure is not dependent on its docking score, the  $ee\%_{\text{calc}}$  is mostly unaffected by whether the top10% or top20% starting structures are selected for MD simulations.

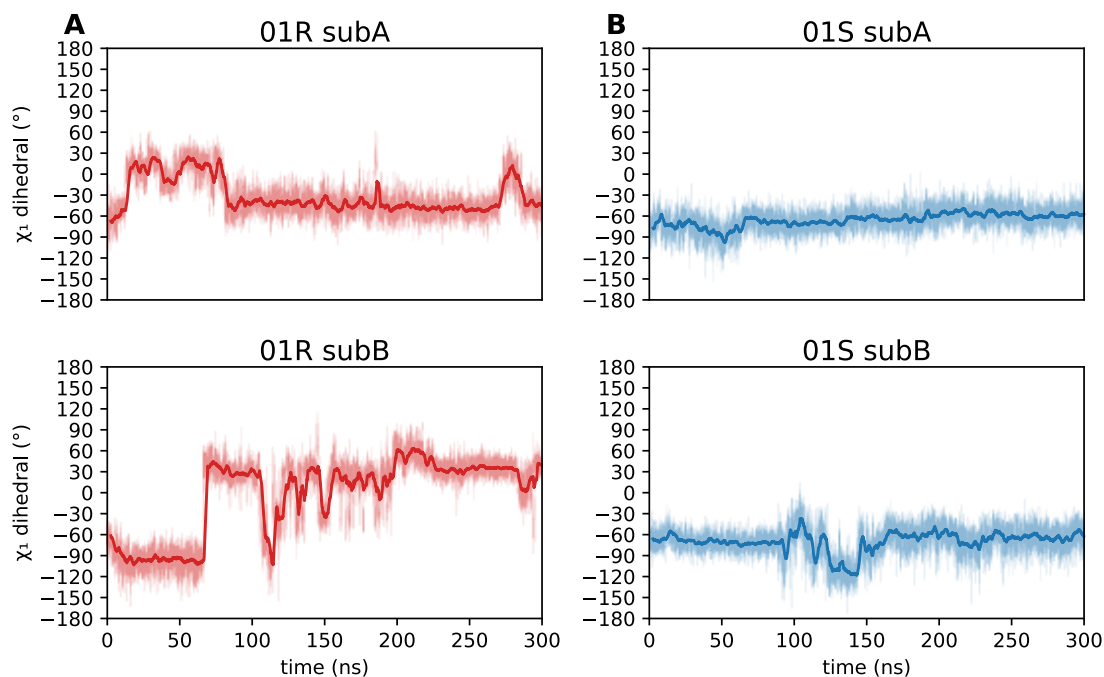

**Figure S7. Time evolution of the  $\chi_1$  dihedral in 300 ns MD simulations.** **A)** Ligand **01R** bound in the binding site mainly formed by residues of subunit A (*top*) and subunit B (*bottom*). **B)** Ligand **01S** bound in the binding site mainly formed by residues of subunit A (*top*) and subunit B (*bottom*). Ligand **01R** means “the external aldimine of compound **01** that would lead to the production of the (*R*)-amine”. The  $\chi_1$  dihedral of the docked complex was  $-90.0^\circ$  in all cases. The figure shows that the  $\chi_1$  dihedral evolves slowly: in the simulation of **01R** (subunit B) it takes 65 ns for  $\chi_1$  to jump out of the catalytic region ( $\chi_1 = -90 \pm 15^\circ$ ) to a new region ( $\chi_1 \approx +30^\circ$ ), where it remains for 40 ns. Therefore, short MD simulations (tens of ps) would be unable to sample  $\chi_1$ .



**Table S1. Comparison of the  $ee\%$  calculated using additional simulation setups.** MD simulations were run for either 20 ps with 5 random initiation seeds ( $5 \times 20\text{ps}$ ) or 100 ps with only one initiation seed ( $1 \times 100\text{ps}$ ). The proportion of Rosetta structures that were selected to be used as starting conformations for MD were either the top20% (64 out of 320 structures) or top10% (32 out of 320 total structures). An additional column is included where no scanning of the  $\chi_1$  dihedral was performed by Rosetta, and instead all ligands were docked with  $\chi_1 = -90^\circ$ . From this table, the best simulation setup is  $5 \times 20 \text{ ps} + \text{top20\%}$  (with  $\chi_1$  scanning) as the  $ee\%_{\text{calc}}$  most closely matches the  $ee\%_{\text{exp}}$ .

| Compound        | $ee\%_{\text{exp}}$ | $ee\%_{\text{calc}}$     |        |                           |        |                          |
|-----------------|---------------------|--------------------------|--------|---------------------------|--------|--------------------------|
|                 |                     | $5 \times 20 \text{ ps}$ |        | $1 \times 100 \text{ ps}$ |        | $5 \times 20 \text{ ps}$ |
|                 |                     | top20%                   | top10% | top20%                    | top10% | $\chi_1 = -90^\circ$     |
| 01              | 99%                 | 82                       | 82     | 63                        | 48     | 71                       |
| 02              | 84-89%              | 84                       | 95     | 88                        | 99     | 80                       |
| 03              | 97-99%              | 98                       | 97     | 91                        | 99     | 12                       |
| 04              | 93-99%              | 56                       | 60     | 72                        | 75     | 74                       |
| 05              | 92-96%              | 92                       | 85     | 81                        | 85     | 95                       |
| 06              | 96-99%              | 47                       | 85     | 72                        | 94     | -2                       |
| 07              | 98-99%              | 99                       | 97     | 92                        | 95     | -65                      |
| 08              | 66-99%              | 100                      | 100    | 100                       | 100    | -13                      |
| 09              | 99%                 | 94                       | 100    | 61                        | 100    | -31                      |
| 10              | 96-99%              | 100                      | 100    | 100                       | 100    | 48                       |
| 11              | 95-99%              | 100                      | 100    | 100                       | 100    | 10                       |
| 12              | 90%                 | 98                       | 99     | 90                        | 93     | 83                       |
| 13              | 99%                 | 4                        | 55     | -25                       | 12     | -28                      |
| 14              | 80%                 | 99                       | 99     | 99                        | 99     | 98                       |
| 15              | 99%                 | -37                      | -47    | -46                       | -57    | -65                      |
| 16              | 99%                 | 98                       | 100    | 92                        | 90     | 70                       |
| 17              | 100%                | 100                      | 100    | 100                       | 100    | -64                      |
| 18              | 90%                 | 84                       | 71     | 83                        | 73     | -4                       |
| 19              | 99%                 | 95                       | 100    | 97                        | 100    | 30                       |
| 20              | 96%                 | 96                       | 100    | 91                        | 100    | -44                      |
| 21              | 99%                 | 92                       | 96     | 73                        | 94     | 21                       |
| 22              | 99%                 | 100                      | 100    | 100                       | 100    | 3                        |
| 23              | 99%                 | 99                       | 97     | 99                        | 98     | -31                      |
| 24              | 98%                 | 97                       | 98     | 94                        | 95     | 84                       |
| 25              | 99%                 | 100                      | 100    | 100                       | 100    | -18                      |
| 26              | 99%                 | 72                       | 100    | 52                        | 100    | -62                      |
| 27              | 99%                 | 83                       | 96     | 79                        | 100    | -9                       |
| 28              | 81%                 | 49                       | 55     | 71                        | 79     | 58                       |
| 29              | 99%                 | 100                      | 100    | 100                       | 100    | -79                      |
| 30              | 95%                 | 91                       | 98     | 93                        | 96     | 77                       |
| 31              | 99%                 | 78                       | 89     | 77                        | 78     | -52                      |
| 32 <sup>#</sup> | -98%                | 34                       | 35     | 32                        | 29     | 79                       |
| 33 <sup>#</sup> | -98%                | -96                      | -100   | -98                       | -100   | -3                       |
| 34              | 40%                 | -42                      | -40    | -24                       | -9     | -61                      |
| 35              | -99%                | 42                       | -23    | 13                        | -45    | 61                       |
| 36              | -98%                | 9                        | -7     | -6                        | -29    | -70                      |
| 37              | 99%                 | 95                       | 99     | 96                        | 99     | 53                       |
| 38              | 99%                 | 83                       | 91     | 75                        | 90     | 33                       |
| 39              | 99%                 | 100                      | 100    | 100                       | 100    | 22                       |

|                 |            |     |     |     |     |     |
|-----------------|------------|-----|-----|-----|-----|-----|
| 40              | 18-54%     | -31 | -47 | -34 | -52 | -22 |
| 41              | 76%        | 23  | 41  | -1  | 18  | -22 |
| 42              | 99%        | 1   | 6   | -5  | 11  | -37 |
| 43              | 97-98%     | -11 | -36 | -33 | -59 | --  |
| 44              | 93-99%     | 55  | 50  | 23  | 20  | 58  |
| 45 <sup>#</sup> | -1 to -40% | -59 | -69 | -62 | -75 | -74 |
| 46              | 99%        | 68  | 95  | 74  | -21 | 99  |
| 47              | 15%        | 56  | 50  | 75  | 70  | 1   |
| 48              | 70%        | 80  | 97  | 81  | 89  | 22  |
| 49              | 90%        | 87  | 87  | 90  | 88  | 79  |

<sup>#</sup> Different R/S notation due to shift in CIP, but preferred enantiomer with similar stereoconfiguration as (*S*)-**01**.
